# 1 Verbal autopsy analysis of childhood deaths in rural Gambia

2 Baleng Mahama Wutor<sup>1\*</sup>, Isaac Osei<sup>1,2</sup>, Lobga Babila Galega<sup>1</sup>, Esu Ezeani<sup>1</sup>, Williams Adefila<sup>1</sup>, Ilias  
3 Hossain<sup>1</sup>, Golam Sarwar<sup>1</sup>, Grant Mackenzie<sup>1,2,3,4</sup>

4 <sup>1</sup>Medical Research Council Unit The Gambia at London School of Hygiene & Tropical Medicine, The  
5 Gambia

6 <sup>2</sup>Faculty of Infectious and Tropical Diseases, London School of Hygiene & Tropical Medicine, London,  
7 United Kingdom

8 <sup>3</sup>Murdoch Children's Research Institute, Melbourne, Australia

9 <sup>4</sup>Department of Paediatrics, University of Melbourne, Melbourne, Australia

10 \*Corresponding author

11 Phone: +2202750604

12 Email: [bwutor@mrc.gm](mailto:bwutor@mrc.gm) (BMW)

13

14

15

16

17

18 **NOTE: This preprint reports new research that has not been certified by peer review and should not be used to guide clinical practice.**

## 19 **Abstract**

### 20 **Background**

21 In low-resource settings, it is challenging to ascertain the burden and causes of under-5 mortality as  
22 many deaths occur outside health facilities. Verbal autopsy (VA) is an important tool that provides  
23 data on causes of death in communities with limited access to health care. We aimed to determine  
24 the causes of childhood deaths by VA in rural Gambia.

### 25 **Methodology**

26 We used WHO standard questionnaires to conduct VAs for deaths under-5 years of age in the Basse  
27 and Fuladu West Health and Demographic Surveillance Systems in rural Gambia between September  
28 01, 2019, and December 31, 2021. Two physicians assigned a cause of death and discordant diagnoses  
29 were resolved by consensus. Causes of death were classified using the International Classification of  
30 Disease 10th edition codes.

### 31 **Results**

32 VAs were conducted for 89% (647/727) of deaths. Of these deaths, 49.5% (n=319) occurred at home,  
33 50.1% (n=324) in females, 37.1% (n=240) in neonates, and 27.1% (n=175) in infants aged 1-11 months.  
34 Outside the neonatal period, pneumonia (27.0%, n=110), diarrhoeal diseases (23.3%, n=95), and sepsis  
35 (21.6%, n=88) were the commonest primary causes of death. In the neonatal period, unspecified  
36 perinatal causes of death (29.6%, n=71), birth asphyxia (23.8%, n=57) and prematurity/low birth  
37 weight (17.1%, n=41) were the commonest causes. Severe malnutrition (28.6%, n=185), unspecified  
38 perinatal deaths (10.7%, n=69), pneumonia (10.2%, n=66), and prematurity/low birth weight (10.2%,  
39 n=66) were the commonest underlying causes of death.

### 40 **Conclusion**

41 According to VA analysis, half of deaths amongst children under-5 in rural Gambia occur at home.  
42 Pneumonia, diarrhoea, and sepsis, and the underlying cause of severe malnutrition, as well as birth  
43 asphyxia in neonates, remain the predominant causes of child mortality in rural Gambia. Improved  
44 health care and health-seeking behaviour may reduce childhood deaths in rural Gambia.

45

46

## 47 **Introduction**

48 Reliable data on under-5 mortality is needed to effectively track progress towards attaining  
49 Sustainable Development Goal 3.2 which seeks to reduce neonatal and under-5 mortality to 12 per  
50 1000 live births and 25 per 1000 live births respectively by 2030[1]. Globally, under-5 mortality in 2019  
51 was estimated to be about 5.2 million[2]. More than half of these deaths occurred in Sub-Saharan  
52 Africa. Accurate and complete morbidity and mortality data are essential not only for planning and  
53 research purposes but also for measuring the impact of health interventions[3]. This is especially  
54 important in low and middle-income countries where resources are limited and need to be prioritized  
55 [4].

56 Although some progress has been made in gathering data for evidence-based decision-making in child  
57 health, major gaps still exist[5]. Whereas death registration coverage is nearly 100% in the World  
58 Health Organisation (WHO) European Region, coverage is less than 10% in the African Region[6]. Even  
59 where Civil Registration and Vital Statistics (CRVS) systems exist in low and middle-income countries,  
60 they are often weak and incomplete [7]. Apart from the weak systems in these countries, a significant  
61 number of deaths in rural communities occur at home or health posts. Such deaths are not likely to  
62 be recorded and consequently, a cause of death will not be assigned. This paucity of mortality data  
63 tends to further perpetuate health inequalities[8].

64 To help fill this gap, the verbal autopsy (VA) was developed and refined over several years to help  
65 provide mortality data in countries with weak CRVS systems and in areas where deaths occur at home  
66 and are not reported[6, 9, 10]. A VA is a structured questionnaire that is used to ascertain the cause  
67 of death by interviewing caregivers or the next of kin who were present during the illness and at the  
68 time of death[6]. The caregiver or next of kin is asked about the signs and symptoms the deceased  
69 exhibited in the immediate days preceding their demise. Though VAs have several limitations and  
70 logistical challenges, they have proved over the years to be a viable option in determining unknown  
71 causes of death[11, 12]. This is especially so in sub-Saharan Africa where there are major hurdles to  
72 incisional autopsies. Apart from the lack of qualified personnel to perform incisional autopsies, relatives  
73 often cite religious and cultural grounds and fears of mutilating the deceased's body as reasons for  
74 refusing such autopsies[13].

75 Information gathered from a verbal autopsy is used to determine the cause of death using various  
76 methods. Some of these methods include Physician-Certified Verbal Autopsy (PCVA)[14] and  
77 computer-based probabilistic methods [15, 16]. Some of the computer algorithms that have been  
78 developed to assign causes of death using VA data include InterVA4, SmartVA, and InSilicoVA[17-19].  
79 However, the widely used method of VA in sub-Saharan Africa is the PCVA which typically involves  
80 two physicians who assign a cause of death based on the information recorded in the VA interview  
81 [14, 20]. Even though PCVA can be time-consuming and expensive to undertake, it remains a valuable  
82 tool for assigning causes of death for deaths occurring outside the healthcare setting[21]. Given its  
83 widespread usage, it has been the most validated type of VA[20].

84 Where Health and Demographic Surveillance Systems (HDSS) exist, VAs are routinely conducted and  
85 provide vital data on mortality at the level of the community. Though HDSS are often difficult and  
86 expensive to establish and maintain, they provide a vital platform for research and surveillance  
87 activities. There are currently 48 HDSS sites across Africa and Asia which collaborate through the  
88 INDEPTH Network to undertake longitudinal collection of health and demographic data in low and

89 middle-income countries[22]. These HDSS sites have been instrumental in filling the gap in capturing  
90 mortality data in a range of defined populations[23].

91 In this study, we sought to characterise causes of death assigned using PCVA within two HDSS sites in  
92 The Gambia (Basse and Fuladu West HDSS sites).

93

## 94 **Methodology**

### 95 **Study Setting**

96 The Gambia is the smallest country in mainland Africa with a population of about 2.4 million. According  
97 to the 2018 Gambia Multiple Indicator Cluster Survey, 15.4% of the population are children under-5  
98 years of age and the mortality in this age group is about 57 per 1,000 live births[24]. The Gambia  
99 currently does not have a robust CRVS system and many deaths in rural communities go unreported  
100 and the causes are not ascertained.

101 The Medical Research Council Unit The Gambia (MRCG) is a leading biomedical research institution  
102 based in The Gambia. Over several decades of its existence, it has established and currently operates  
103 four HDSS sites across the country. These are in the Farafenni, West Kiang, Fuladu West, and Basse  
104 areas. These platforms not only collect important health and demographic data but also routinely  
105 conduct VAs.

106 The Basse HDSS was established in 2007 in the Upper River Region of the Gambia and has been vital  
107 in several field studies[25-27]. It is located in the eastern part of the Gambia on the south bank of the  
108 River Gambia and covers an area of approximately 1,100 km<sup>2</sup>. The mostly rural area is inhabited by  
109 about 202,000 residents with about 225 villages. Children aged less than 5 years make up 19% of the  
110 population. Most of the population practice Islam. The Sarahule and Fula tribes are the commonest  
111 ethnic groups in the area. The months from June to October experience a wet season, while the

112 remaining months are dry. Most of the inhabitants are either crop or livestock farmers. The district  
113 hospital at Basse is the major health facility in the region and receives referrals from smaller clinics in  
114 the area.

115 The Fuladu West HDSS is located in the Central River Region and extends towards the west along the  
116 south bank of the River Gambia. It is made up of 213 villages with a total population of 99,113. The  
117 main hospital in the area is Bansang Hospital which receives referrals from the Central River Region as  
118 well as the Upper River Region. The Basse and Fuladu West HDSSs currently support the cluster-  
119 randomized Pneumococcal Vaccines Schedules clinical trial[28]. Fig 1 below shows a map of the  
120 Gambia showing the Basse and Fuladu West HDSS sites.

#### 121 **Fig 1. Map of The Gambia highlighting the Basse and Fuladu West HDSS sites**

122 The Basse District Hospital and Bansang Hospital are the major health facilities within the study area.  
123 Eight health centres in the Upper River Region provide primary health care and refer patients to Basse  
124 District Hospital when the need arises. Bansang Hospital serves the Central River Region and acts as  
125 the referral point for patients from Basse District Hospital. Both Health facilities also provide medical  
126 services to patients from the North Bank across The River Gambia as well as patients from Senegal.

### 127 **Study design**

128 Verbal autopsies were conducted for deaths of children under-5 between September 01, 2019, and  
129 December 31, 2021. The VAs were coded by four physicians who worked in pairs. Each physician  
130 worked independently to assign a probable cause of death based on the information captured in the  
131 verbal autopsy forms. In each case, a primary and underlying cause of death was coded using  
132 information captured in the VA interview. The disease condition or terminal event which occurred just  
133 before the death was selected as the primary cause of death. The morbid condition or injury which  
134 initiated the chain of events leading to the death was selected as the underlying cause of death[29].

135 After coding, the results of both physicians were compared, and the points of disagreement were  
136 identified. These discrepancies were resolved by a consensus review of the verbal autopsy by the two  
137 physicians. The causes of death were assigned using a shortlist of deaths that could be ascertained  
138 from VA and mapped to the International Classification of Disease 10 codes[30].

## 139 **Data Collection**

140 Trained field workers undertake household visits within the Basse and Fuladu West HDSS areas every  
141 4 months. Data on all deaths, births, migrations, pregnancies, and the vaccination status of children  
142 are captured during visits. Verbal autopsies are conducted routinely when deaths are identified after  
143 a grieving period of about one month. The interviews are conducted using standardised closed-ended  
144 WHO VA questionnaires designed for neonates and children 1-59months of age[31]. Field workers  
145 were trained on each item of the questionnaire and how to conduct interviews with respect and  
146 understanding. During interviews, the questions are translated by field workers from English into the  
147 appropriate local language of the respondent. Corresponding data is captured into a tablet application  
148 using the Research Electronic Data Capture (REDCap) application database system[32].

## 149 **Statistical Analysis**

150 All analyses were performed using Stata version 17 (StataCorp, College Station, TX, USA). The data  
151 were assessed for errors and missing values. Age was categorized into four groups to describe age-  
152 specific mortality (neonates 0-27days), 1-11 months, 12-23months, and 2-5 years). Variables with few  
153 numbers were grouped as “other”. Summary statistics were performed for key background  
154 characteristics such as sociodemographic factors, primary causes of death, underlying causes of death,  
155 and contextual factors (decision to seek care, access to medical care, and adequacy of care). The  
156 summary of the results is presented using frequency tables and percentages.

## 157 **Ethical Consideration**

158 The collection of VA data is one of the procedures undertaken by the Basse and Fuladu West HDSSs.  
159 The HDSSs include hundreds of thousands of residents and constitute minimal risk observational  
160 research with data used by multiple research projects, non-government organisations, and  
161 government agencies. For these reasons, verbal consent is sought from the head of each household  
162 at each household visit. The operation and procedures of both the Basse and Fuladu West HDSS have  
163 been approved by the Gambia Government/MRCG Joint Ethics Committee (SCC number 1577).

## 164 **Results**

### 165 **Socio-demographic characteristics**

166 Verbal autopsies were conducted for 647 of 727 (89%) detected deaths of children aged less than 5  
167 years during the observation period. Table 1 describes the socio-demographic characteristics of the  
168 evaluated deaths. Most of the deaths occurred in the neonatal period (37.1%, n=240). Outside of the  
169 neonatal period, 175 (27.1%) deaths occurred in the first year of life, 89 (13.8%) in the second year of  
170 life, and the remaining between 2 and less than 5 years of age (22.1%, n=143). There were comparable  
171 numbers of male and female deaths, with 324 (50.1%) females and 321 (49.6%) males.

172 Most of the deaths occurred amongst the Sarahule tribe (34.6%, n=224) and the Fula tribe (32.1%,  
173 n=208) which are the largest ethnic groups in the study area. Almost all the respondents who gave  
174 information relating to the circumstances of the deaths were family members, with 92.9% (n=601)  
175 being the parent(s) of the deceased. During the period of illness that led to death, 98% (n=631) of the  
176 respondents lived with the deceased. Concerning seasonality, 39.9 % (n=258) of the deaths occurred  
177 during the wet season, while the rest occurred during the dry season (60.1%, n=389). The majority of  
178 deaths occurred at home (49.5%, n=319) (Table 1).

#### 179 **Table 1: Socio-demographic characteristics of the deceased**



| <b>Variables</b>                                                 | <b>Frequency (n=647) *</b> | <b>Percentage (%)</b> |
|------------------------------------------------------------------|----------------------------|-----------------------|
| <b>Age group</b>                                                 |                            |                       |
| Neonates (0-27days)                                              | 240                        | 37.1                  |
| 1-11months                                                       | 175                        | 27.1                  |
| 12-23 months                                                     | 89                         | 13.8                  |
| 2-5years                                                         | 143                        | 22.1                  |
| <b>Sex</b>                                                       |                            |                       |
| Female                                                           | 324                        | 50.1                  |
| Male                                                             | 321                        | 49.6                  |
| <b>Ethnicity</b>                                                 |                            |                       |
| Fula                                                             | 208                        | 32.2                  |
| Sarahule                                                         | 224                        | 34.6                  |
| Wolof                                                            | 42                         | 6.5                   |
| Mandinka                                                         | 162                        | 25.0                  |
| Others                                                           | 11                         | 1.7                   |
| <b>Relationship of respondent to the deceased</b>                |                            |                       |
| Parent                                                           | 601                        | 92.9                  |
| Family member                                                    | 43                         | 6.7                   |
| Another relationship                                             | 3                          | 0.5                   |
| <b>Did respondent live with the deceased during the illness?</b> |                            |                       |
| Yes                                                              | 631                        | 97.5                  |
| No                                                               | 9                          | 1.4                   |

| <b>Season of death</b>   |     |      |
|--------------------------|-----|------|
| Wet                      | 258 | 39.9 |
| Dry                      | 389 | 60.1 |
| <b>Place of death</b>    |     |      |
| Home                     | 319 | 49.5 |
| Hospital                 | 179 | 27.8 |
| Other health facility    | 123 | 19.1 |
| En route to the hospital | 17  | 2.6  |
| Other                    | 6   | 0.9  |

180 \*Due to missing values, not all N values equal 647 i.e., Sex=2 missing values, Did the respondent live  
 181 with the deceased= 7 missing, Place of death= 3 missing values

## 182 **Contextual factors**

183 In the final days of the illness, most parents knew that the deceased needed medical care (72.2%,  
 184 n=464). However, in most cases, care was not sought outside the home (63.7%, n=421) and for those  
 185 who sought any care outside the home, most of them went to a hospital or health centre (90.9%,  
 186 n=210). Only a few respondents used a mobile phone to call for help during the period of illness  
 187 (12.3%, n=79) (Table 2).

188 In most cases, there was the need to travel to a hospital or health facility (71.3%, n=460). In terms of  
 189 access, most of the respondents lived less than 2hrs from a health facility (88.2%, n=569). In 72.9%  
 190 (n=471) of cases, the deceased received some form of treatment during the illness

191 For those who visited a health facility, there were no problems in how the deceased were treated  
 192 (treatment, procedures, attitude, respect, dignity) in the hospital/health facility in most cases (98.3%,  
 193 n=453). Only a few respondents reported having challenges getting medications or diagnostic tests at  
 194 health facilities (12.8%, n=59) (Table 2).

195 **Table 2: Contextual factors**

| Contextual factor                                                                           | Frequency (n=647) * | Percentage (%) |
|---------------------------------------------------------------------------------------------|---------------------|----------------|
| <b>1. Decision to seek care</b>                                                             |                     |                |
| <b>In the final days of illness, were there any doubts whether medical care was needed?</b> |                     |                |
| Yes                                                                                         | 179                 | 27.8           |
| <b>Sought care outside home</b>                                                             |                     |                |
| Yes                                                                                         | 231                 | 35.7           |
| <b>Where was care sought?</b>                                                               |                     |                |
| Traditional Healer                                                                          | 7                   | 3.0            |
| Hospital                                                                                    | 57                  | 24.7           |
| Health Centre                                                                               | 153                 | 66.2           |
| Others                                                                                      | 14                  | 6.1            |
| <b>In the final days of illness, did anyone use a phone to call for help?</b>               |                     |                |
| Yes                                                                                         | 79                  | 12.3           |
| <b>2. Access to medical care</b>                                                            |                     |                |
| <b>Does it take more than 2hrs to get to the nearest hospital/health facility</b>           |                     |                |
| Yes                                                                                         | 76                  | 11.8           |
| <b>In the final days before death, did s/he travel to a hospital or health facility?</b>    |                     |                |
| Yes                                                                                         | 460                 | 71.3           |
| <b>3. Adequacy of medical care</b>                                                          |                     |                |

|                                                                                                              |     |      |
|--------------------------------------------------------------------------------------------------------------|-----|------|
| <b>Did (s)he receive any treatment for the illness that led to death?</b>                                    |     |      |
| Yes                                                                                                          | 471 | 72.9 |
| <b>Were there any problems with the way (s)he was treated in the hospital or health facility †</b>           |     |      |
| Yes                                                                                                          | 8   | 1.7  |
| <b>Were there any problems getting medications, or diagnostic tests in the hospital or health† facility?</b> |     |      |
| Yes                                                                                                          | 59  | 12.8 |

196 \*Due to missing data, not all N categories sum up to 647:

197 Missing values: In the final days of illness, were there any doubts whether medical care was needed?  
198 (4), Sought care outside home (2), In the final days of illness, did anyone use a phone to call for help?  
199 (2), Does it take more than 2hrs to get to the nearest hospital/health facility (2), In the final days before  
200 death, did s/he travel to a hospital or health facility? (2), Did (s)he receive any treatment for the illness  
201 that led to death? (1), Were there any problems with the way (s)he was treated in the hospital or  
202 health facility (1).

203 † Total frequency= 462

204

## 205 Primary causes of death

206 The primary causes of death are described in Table 3. Pneumonia (17%, n=110), diarrhoeal diseases  
207 (14.7%, n=95), sepsis (13.6%, n=88) and unspecified perinatal causes of death (11%, n=71) were the  
208 commonest primary causes of death. In the neonatal period, unspecified perinatal causes of death  
209 (29.6%, n=71), birth asphyxia (23.8%, n=57) and prematurity/low birth weight (17.1%, n=41) were the  
210 commonest causes of death. Outside the neonatal period, pneumonia (27.0%, n=110), diarrhoeal  
211 diseases (23.3%, n=95) and sepsis (21.6%, n=88) were the commonest primary causes of death. Of  
212 note, there were few malaria deaths (0.8%, n=5).

213 **Table 3. Primary causes of death**

| Primary cause of death | Frequency (N=647) | Percentage (%) |
|------------------------|-------------------|----------------|
| <b>(0-59months)</b>    |                   |                |

|                                                |     |      |
|------------------------------------------------|-----|------|
| Pneumonia                                      | 110 | 17.0 |
| Diarrheal diseases                             | 95  | 14.7 |
| Sepsis                                         | 88  | 13.6 |
| Other and unspecified perinatal cause of death | 71  | 11.0 |
| Birth Asphyxia                                 | 57  | 8.8  |
| Prematurity Low Birth weight                   | 41  | 6.3  |
| Fresh stillbirth                               | 30  | 4.6  |
| Acute respiratory infection                    | 27  | 4.2  |
| Meningitis                                     | 26  | 4.0  |
| Severe Anaemia                                 | 26  | 4.0  |
| Cause of death unknown                         | 24  | 3.7  |
| Neonatal Sepsis                                | 16  | 2.5  |
| Road Traffic Accident                          | 6   | 0.9  |
| Malaria                                        | 5   | 0.8  |
| Neonatal Pneumonia                             | 4   | 0.6  |
| Others                                         | 21  | 3.2  |
| <b>Neonatal period (0-27days)</b>              |     |      |
| Other and unspecified perinatal cause of death | 71  | 29.6 |
| Birth Asphyxia                                 | 57  | 23.8 |
| Prematurity Low Birth weight                   | 41  | 17.1 |
| Fresh stillbirth                               | 30  | 12.5 |
| Neonatal Sepsis                                | 16  | 6.7  |
| Cause of death unknown                         | 13  | 5.4  |

|                                              |     |      |
|----------------------------------------------|-----|------|
| Severe Anaemia                               | 6   | 2.5  |
| Neonatal Pneumonia                           | 4   | 1.7  |
| Accidental fall                              | 1   | 0.4  |
| Macerated stillbirth                         | 1   | 0.4  |
| <b>1month-59months</b>                       |     |      |
| Pneumonia                                    | 110 | 27.0 |
| Diarrheal diseases                           | 95  | 23.3 |
| Sepsis                                       | 88  | 21.6 |
| Acute respiratory infection                  | 27  | 6.6  |
| Meningitis                                   | 26  | 6.4  |
| Severe Anaemia                               | 20  | 4.9  |
| Cause of death unknown                       | 11  | 2.7  |
| Road Traffic Accident                        | 6   | 1.5  |
| Malaria                                      | 5   | 1.2  |
| Severe Malnutrition                          | 4   | 1.0  |
| Contact with venomous animals and plants     | 3   | 0.7  |
| Accidental exposure to smoke fire and flames | 2   | 0.5  |
| Assault                                      | 2   | 0.5  |
| Other and unspecified cardiac disease        | 2   | 0.5  |
| Accidental drowning and submersion           | 1   | 0.3  |
| Others                                       | 5   | 1.2  |

214

215 Fig 2 shows the primary causes of death grouped into infectious and non-infectious causes. Out of

216 the 647 deaths, 57.3% (N=371) were due to infectious causes while the rest were due to non-

217 infectious causes. Pneumonia, diarrhoeal diseases, and sepsis were the commonest infectious  
218 causes of death whereas birth asphyxia, prematurity/low birth weight, and fresh stillbirths were the  
219 commonest non-infectious causes of death.

220 **Figure 2. Primary causes of deaths grouped into infectious and non-infectious causes, 647 deaths**

## 221 **Underlying causes of death**

222 Table 4 describes the underlying causes of death by age category. Severe malnutrition (28.6%, N=185),  
223 unspecified perinatal deaths (10.7%, N=69), pneumonia (10.2%, N=66) and prematurity/low birth  
224 weight (10.2%, N=66) were the commonest underlying causes of death.

225 Of the 240 neonatal deaths that were coded, 69 (28.8%) were unspecified neonatal deaths, 25 (25%)  
226 were due to prematurity/low birth weight and the cause of death was unknown in 32 (13.3%) cases.

227 Amongst the deaths which occurred outside of the neonatal period, the trio of severe malnutrition  
228 (45.2%, N=184), pneumonia (16.2%, N=66), and sepsis (15.7%, N=64) were the top three underlying  
229 causes of death.

230 **Table 4: Underlying causes of death**

| Underlying causes of death                     | Frequency (N=647) | Percentage (%) |
|------------------------------------------------|-------------------|----------------|
| <b>0-59months</b>                              |                   |                |
| Severe Malnutrition                            | 185               | 28.6           |
| Other and unspecified perinatal cause of death | 69                | 10.7           |
| Pneumonia                                      | 66                | 10.2           |
| Prematurity Low Birth weight                   | 66                | 10.2           |
| Sepsis                                         | 64                | 9.9            |
| Cause of death unknown                         | 42                | 6.5            |

|                                                |    |      |
|------------------------------------------------|----|------|
| Fresh stillbirth                               | 29 | 4.5  |
| Birth Asphyxia                                 | 28 | 4.3  |
| Acute respiratory infection                    | 27 | 4.2  |
| Neonatal Sepsis                                | 13 | 2.0  |
| Diarrheal diseases                             | 8  | 1.2  |
| Malaria                                        | 8  | 1.2  |
| Meningitis                                     | 8  | 1.2  |
| Neonatal Pneumonia                             | 6  | 0.9  |
| Road Traffic Accident                          | 6  | 0.9  |
| Accidental fall                                | 3  | 0.5  |
| Contact with venomous animals and plants       | 3  | 0.5  |
| Others                                         | 16 | 2.5  |
| <b>Neonatal (0days-27days)</b>                 |    |      |
| Other and unspecified perinatal cause of death | 69 | 28.8 |
| Prematurity Low Birth weight                   | 60 | 25.0 |
| Cause of death unknown                         | 32 | 13.3 |
| Fresh stillbirth                               | 29 | 12.1 |
| Birth Asphyxia                                 | 28 | 11.7 |
| Neonatal Sepsis                                | 11 | 4.6  |
| Neonatal Pneumonia                             | 6  | 2.5  |
| Accidental fall                                | 1  | 0.4  |
| Congenital Malformation                        | 1  | 0.4  |
| Macerated stillbirth                           | 1  | 0.4  |
| Others                                         | 2  | 0.8  |



| 1month-59 months                             |     |      |
|----------------------------------------------|-----|------|
| Severe Malnutrition                          | 184 | 45.2 |
| Pneumonia                                    | 66  | 16.2 |
| Sepsis                                       | 64  | 15.7 |
| Acute respiratory infection                  | 27  | 6.6  |
| Cause of death unknown                       | 10  | 2.5  |
| Diarrheal diseases                           | 8   | 2.0  |
| Malaria                                      | 8   | 2.0  |
| Meningitis                                   | 8   | 2.0  |
| Prematurity Low Birth weight                 | 6   | 1.5  |
| Road Traffic Accident                        | 6   | 1.5  |
| Contact with venomous animals and plants     | 3   | 0.7  |
| Accidental exposure to smoke fire and flames | 2   | 0.5  |
| Accidental fall                              | 2   | 0.5  |
| Assault                                      | 2   | 0.5  |
| Others                                       | 11  | 2.7  |

231

## 232 Discussion

233 In this verbal autopsy analysis of deaths of children under-5 years of age in rural Gambia, we found  
 234 that half of all deaths occurred at home. Pneumonia, diarrheal diseases, and sepsis were the leading  
 235 causes of death. Over half of all primary causes of death were due to infectious diseases and severe  
 236 malnutrition contributed to a third of the deaths. The highest number of deaths was in the neonatal  
 237 period and the commonest causes of death in this age group were unspecified perinatal deaths, birth

238 asphyxia, and prematurity/low birth weight. We also found that though most of the respondents were  
239 aware that the deceased needed medical care and lived within 2hrs of a health facility, care was not  
240 sought outside the home in most cases.

241 When deaths occur at home, they are not likely to be identified, recorded, or assigned a cause of  
242 death. This deprives decision makers of the opportunity to have complete data on disease burden  
243 among children under-5. One reason children may be dying at home instead of at health facilities is  
244 the reluctance of parents or caretakers to send them to the hospital when they are sick. This could be  
245 because they did not think the sickness was that serious or resorted to treatment at home. Another  
246 reason could be if treatment was sought in other places other than health facilities. However, in this  
247 study, only a few caretakers reported seeking care from traditional healers or pharmacies. Gupta N.  
248 et al. also found a similarly high number of home deaths in a matched case-control study in  
249 Rwanda[33]. With half of deaths occurring at home, it may be misleading to rely only on health facility  
250 data to characterise deaths of children under-5.

251 We also found that more than a third of deaths occurred in the neonatal period (37%). The high burden  
252 of deaths in the neonatal period was equally noted in an HDSS site in the northern part of India[34]. A  
253 significant proportion of births in The Gambia still occur without the supervision of skilled birth  
254 attendants[24] and may be a contributing factor to the unacceptably high number of neonatal deaths.  
255 From our experience, such neonates are often brought to the health facility a day or two after  
256 developing complications such as jaundice or sepsis.

257 Severe malnutrition and pneumonia were the commonest underlying and primary causes of death  
258 respectively. This is similar to an earlier study in Bangladesh where acute lower respiratory  
259 infection[35] was the most commonest cause of death. In that study, childhood wasting was  
260 additionally identified as the leading risk factor for lower respiratory infections. This is corroborated  
261 by a case-control study in Brazil which identified malnutrition as the most important risk factor for  
262 pneumonia in children[36]. These findings highlight the synergistic role acute malnutrition and

263 pneumonia play in causing the demise of many children under-5. Apart from malnutrition, another  
264 risk factor that may have contributed to the high number of pneumonia deaths is the widespread use  
265 of charcoal and firewood for cooking in the study area. Mothers would usually have their children  
266 close by as they cook, exposing the children to smoke. This risk factor has been identified in a social  
267 autopsy as a major risk factor contributing to childhood deaths[37]. Therefore, measures aimed at  
268 reducing pneumonia deaths should also consider addressing malnutrition and indoor pollution from  
269 smoke.

270 Unspecified perinatal neonatal death was the commonest underlying cause of death in the neonatal  
271 period and the second overall underlying cause of death. This is the case because of the challenge in  
272 assigning specific causes of death using verbal autopsy for neonates who die in the first few days of  
273 life. This challenge was equally recognised by Baqui et al., who in a nationwide verbal autopsy analysis  
274 grouped neonatal deaths in the first three days of life as early perinatal deaths without further  
275 specifying[35]. A similar verbal autopsy study in Angola also identified unspecified neonatal deaths as  
276 the commonest cause of death in the neonatal period[38]. However, due to skip pattern errors in  
277 some of the neonatal verbal autopsy forms in our study, certain symptoms were not elicited. This  
278 further made it difficult to assign a specific cause of death in such cases.

279 One surprising finding in this study was the low number of deaths attributable to malaria since it is  
280 still a leading cause of death in many sub-Saharan countries. This observation however is due to the  
281 low prevalence of malaria in the The Gambia as a result of several years of malaria control  
282 interventions such as the use of insecticide-treated nets and mass drug administration[39-41].  
283 Notwithstanding the non-specificity of malaria symptoms, there was a specific question in the VA  
284 questionnaire concerning whether the deceased had a recent positive malaria test. It is therefore not  
285 likely that malaria deaths were misclassified.

286 The social circumstances that contributed to the deaths were grouped using the three delays model  
287 (decision to seek care, access to care, and adequacy of care). Even though most of the caretakers did

288 not doubt that the deceased needed medical care at the time of the illness, only a few of them sought  
289 care outside of the home. One reason could have been the issue of access to health facilities. However,  
290 the overwhelming majority reported that it did not take more than 2hrs to get to the nearest facility.  
291 A second reason for the reluctance in seeking medical care for the deceased could have been  
292 inadequate/quality of the care the children received at the health facilities. However, most of the  
293 respondents reported no problems in the way the children were treated, and in obtaining medications  
294 and other diagnostic tests.

295 Improved health-seeking behaviours through health education and promotion could contribute to  
296 reducing the number of under-5 deaths in rural Gambia. This, however, should be part of a  
297 comprehensive plan to improve health at all levels including more trained personnel and logistics at  
298 health facilities.

## 299 **Strengths/Limitations**

300 A major strength of our study is using WHO's standardised VA questionnaire. The advantage of this is  
301 that it allows our results to be compared to similar studies conducted using the same standard  
302 questionnaire. The relatively large sample size in this study also strengthens the conclusions drawn  
303 from the study. As noted by Uneke et al[20], the accuracy and reliability of verbal autopsies often  
304 depend on the type of healthcare system available and the experience of the physicians as far as local  
305 disease aetiology and epidemiology are concerned. The four physicians who partook in analysing the  
306 VA interviews and assigning causes of death were trained on the VA tool before the coding began. All  
307 of them have worked in the study area and therefore understand the local disease epidemiology and  
308 common presentations at the health facilities.

309 Another strength of this study is that most of the respondents were first-degree relatives of the  
310 deceased, so more accurate information was likely to be collected by the field workers. Almost all the

311 respondents lived with the deceased during the period of illness, further enhancing the credibility of  
312 the information they provided during the VA interviews.

313 However, verbal autopsy analyses have some inherent limitations. Translation of the VA questionnaire  
314 from English to the local languages may have caused some meaning to be lost or misinterpreted. To  
315 mitigate this, only field workers who were fluent in the language and understood the culture and  
316 customs of the respondent were allowed to conduct such VAs. The field workers were also trained on  
317 the verbal autopsy tool and were conversant with the use of the application for collecting the VA data.

318 Possible recall bias is another well-known limitation of verbal autopsies. To mitigate this in our study,  
319 we ensured that VAs were conducted as soon as possible, being mindful however to allow at least a  
320 month for relatives to mourn the deceased. Though all attempts were made to conduct all pending  
321 VAs, we were unable to perform the VAs for 11% of the deaths mainly due to the migration of primary  
322 respondents outside the study area. As indicated earlier, specific deaths could not be assigned to  
323 some neonatal deaths due to inadequate signs and symptoms in the verbal autopsy forms. Such  
324 deaths were classified as unspecified perinatal deaths.

## 325 **Conclusion**

326 Verbal autopsies are useful in bridging the current gap in countries with weak systems for detecting  
327 and assigning childhood causes of death. According to VA analysis, half of deaths amongst children  
328 under-5 in rural Gambia occur at home. Over half of deaths are due to infectious diseases. Pneumonia  
329 and severe malnutrition are the commonest primary and underlying causes of death respectively.  
330 Though most respondents were aware of the need for medical care and lived close to health facilities,  
331 most did not seek medical care. Improved health-seeking behaviour may reduce childhood deaths in  
332 rural Gambia.

## 333 **Supporting Information**

- 334 S1 File. Minimal Data Set V 1.0
- 335 S2 File. VA Coding list\_V1.0.pdf
- 336 S3 File. WHO\_VA\_2016\_v1.5.3.XLS\_form\_for\_ODK

## 337 Acknowledgements

338 We thank all the grieving families who agreed to be part of this study. We also thank all the  
339 hardworking field workers who undertook the verbal autopsy interviews. We are grateful to the HDSS  
340 team at the Medical Research Council Unit The Gambia at London School of Hygiene and Tropical  
341 Medicine for overseeing and supervising the collection of verbal autopsies.

## 342 References

- 343 1. Organization WH. Child mortality and causes of death 2022 [cited 2022 29/04/22]. Available  
344 from: [https://www.who.int/data/gho/data/themes/topics/indicator-groups/indicator-group-](https://www.who.int/data/gho/data/themes/topics/indicator-groups/indicator-group-details/GHO/sdg-target-3.2-newborn-and-child-mortality)  
345 [details/GHO/sdg-target-3.2-newborn-and-child-mortality](https://www.who.int/data/gho/data/themes/topics/indicator-groups/indicator-group-details/GHO/sdg-target-3.2-newborn-and-child-mortality).
- 346 2. Nations UI-aGfCMEU. Levels & Trends in Child Mortality Report 2019, Estimates developed by  
347 the UN Inter-agency Group for Child Mortality Estimation United Nations. 2019.
- 348 3. Martha A, Robert, E. B., Christopher, C., Henry, D. K., Maria, A. Q., Ross, R., & Robert, W. S. . A  
349 standard verbal autopsy method for investigating causes of death in infants and children. World  
350 Health Organization, 1999.
- 351 4. Byass P. Who needs cause-of-death data? PLoS Medicine. 2007;4(11):e333.
- 352 5. Boerma T, Requejo J, Victora CG, Amouzou A, George A, Agyepong I, et al. Countdown to 2030:  
353 tracking progress towards universal coverage for reproductive, maternal, newborn, and child health.  
354 The Lancet. 2018;391(10129):1538-48.
- 355 6. Mathers CD, Ma Fat D, Inoue M, Rao C, Lopez AD. Counting the dead and what they died from:  
356 an assessment of the global status of cause of death data. Bulletin of the world health organization.  
357 2005;83:171-7c.
- 358 7. Baiden F, Bawah A, Biai S, Binka F, Boerma T, Byass P, et al. Setting international standards for  
359 verbal autopsy. SciELO Public Health; 2007. p. 570-1.
- 360 8. Leitao J, Chandramohan D, Byass P, Jakob R, Bundhamcharoen K, Choprapawon C, et al.  
361 Revising the WHO verbal autopsy instrument to facilitate routine cause-of-death monitoring. Global  
362 health action. 2013;6(1):21518.
- 363 9. Tran HT, Nguyen HP, Walker SM, Hill PS, Rao C. Validation of verbal autopsy methods using  
364 hospital medical records: a case study in Vietnam. BMC medical research methodology. 2018;18(1):1-  
365 10.
- 366 10. Ganapathy SS, Yi KY, Omar MA, Anuar MFM, Jeevananthan C, Rao C. Validation of verbal  
367 autopsy: determination of cause of deaths in Malaysia 2013. BMC public health. 2017;17(1):1-8.
- 368 11. Ngo AD, Rao C, Hoa NP, Adair T, Chuc NTK. Mortality patterns in Vietnam, 2006: Findings from  
369 a national verbal autopsy survey. BMC research notes. 2010;3(1):1-8.

- 370 12. Gajalakshmi V, Peto R. Verbal autopsy of 80,000 adult deaths in Tamilnadu, South India. BMC  
371 public health. 2004;4(1):1-7.
- 372 13. Oluwasola OA, Fawole OI, Otegbayo AJ, Ogun GO, Adebamowo CA, Bamigboye AE. The  
373 autopsy: knowledge, attitude, and perceptions of doctors and relatives of the deceased. Archives of  
374 pathology & laboratory medicine. 2009;133(1):78-82.
- 375 14. Soleman N, Chandramohan D, Shibuya K. Verbal autopsy: current practices and challenges.  
376 Bulletin of the World Health Organization. 2006;84:239-45.
- 377 15. Quigley MA, Chandramohan D, Setel P, Binka F, Rodrigues LC. Validity of data-derived  
378 algorithms for ascertaining causes of adult death in two African sites using verbal autopsy. Tropical  
379 Medicine & International Health. 2000;5(1):33-9.
- 380 16. Byass P, Huong DL, Van Minh H. A probabilistic approach to interpreting verbal autopsies:  
381 methodology and preliminary validation in Vietnam. Scandinavian Journal of Public Health.  
382 2003;31(62\_suppl):32-7.
- 383 17. Byass P, Hussain-Alkhateeb L, D'Ambruoso L, Clark S, Davies J, Fottrell E, et al. An integrated  
384 approach to processing WHO-2016 verbal autopsy data: the InterVA-5 model. BMC medicine.  
385 2019;17(1):1-12.
- 386 18. Serina P, Riley I, Stewart A, Flaxman AD, Lozano R, Mooney MD, et al. A shortened verbal  
387 autopsy instrument for use in routine mortality surveillance systems. BMC medicine. 2015;13(1):1-10.
- 388 19. McCormick TH, Li ZR, Calvert C, Crampin AC, Kahn K, Clark SJ. Probabilistic cause-of-death  
389 assignment using verbal autopsies. Journal of the American Statistical Association.  
390 2016;111(515):1036-49.
- 391 20. Uneke CJ, Uro-Chukwu HC, Chukwu OE. Validation of verbal autopsy methods for assessment  
392 of child mortality in sub-Saharan Africa and the policy implication: a rapid review. The Pan African  
393 Medical Journal. 2019;33.
- 394 21. Yé M, Diboulo E, Niamba L, Sié A, Coulibaly B, Bagagnan C, et al. An improved method for  
395 physician-certified verbal autopsy reduces the rate of discrepancy: experiences in the Nouna Health  
396 and Demographic Surveillance Site (NHDSS), Burkina Faso. Population health metrics. 2011;9(1):1-9.
- 397 22. Network I. Member HDSSs [26/02/22]. Available from: [https://www.indepth-](https://www.indepth-network.org/member-centres)  
398 [network.org/member-centres](https://www.indepth-network.org/member-centres).
- 399 23. Baiden F, Hodgson A, Binka FN. Demographic surveillance sites and emerging challenges in  
400 international health. Bulletin of the World Health Organization. 2006;84:163-.
- 401 24. Statistics TGBo. The Gambia multiple indicator cluster survey 2018: survey findings report. July  
402 2019.
- 403 25. Mackenzie GA, Hill PC, Jeffries DJ, Hossain I, Uchendu U, Ameh D, et al. Effect of the  
404 introduction of pneumococcal conjugate vaccination on invasive pneumococcal disease in The  
405 Gambia: a population-based surveillance study. The Lancet infectious diseases. 2016;16(6):703-11.
- 406 26. Quattrochi J, Jasseh M, Mackenzie G, Castro MC. Spatial analysis of under-5 mortality and  
407 potential risk factors in the Basse Health and Demographic Surveillance System, the Gambia. Tropical  
408 Medicine & International Health. 2015;20(7):941-51.
- 409 27. Scott S, Odutola A, Mackenzie G, Fulford T, Afolabi MO, Jallow YL, et al. Coverage and timing  
410 of children's vaccination: an evaluation of the expanded programme on immunisation in the Gambia.  
411 PloS one. 2014;9(9):e107280.
- 412 28. Mackenzie GA, Osei I, Salaudeen R, Hossain I, Young B, Secka O, et al. A cluster-randomised,  
413 non-inferiority trial of the impact of a two-dose compared to three-dose schedule of pneumococcal  
414 conjugate vaccination in rural Gambia: the PVS trial. Trials. 2022;23(1):1-23.
- 415 29. Classification of causes of death [Internet]. [cited 27/09/2022]. Available from:  
416 <https://www.who.int/standards/classifications/classification-of-diseases/cause-of-death>.
- 417 30. International Statistical Classification of Diseases and Related Health Problems 10th Revision  
418 [Internet]. [cited 02/06/2022]. Available from: <https://icd.who.int/browse10/2019/en>.
- 419 31. Organization WH. Verbal autopsy standards: ascertaining and attributing cause of death:  
420 World Health Organization; 2007.

- 421 32. Harris PA, Taylor R, Minor BL, Elliott V, Fernandez M, O'Neal L, et al. The REDCap consortium:  
422 Building an international community of software platform partners. *Journal of biomedical informatics*.  
423 2019;95:103208.
- 424 33. Gupta N, Hirschhorn LR, Rwabukwisi FC, Drobac P, Sayinzoga F, Mugeni C, et al. Causes of  
425 death and predictors of childhood mortality in Rwanda: a matched case-control study using verbal  
426 social autopsy. *BMC public health*. 2018;18(1):1-9.
- 427 34. Rai SK, Kant S, Srivastava R, Gupta P, Misra P, Pandav CS, et al. Causes of and contributors to  
428 infant mortality in a rural community of North India: evidence from verbal and social autopsy. *BMJ*  
429 *open*. 2017;7(8):e012856.
- 430 35. Baqui AH, Black RE, Arifeen S, Hill K, Mitra S, Al Sabir A. Causes of childhood deaths in  
431 Bangladesh: results of a nationwide verbal autopsy study. *Bulletin of the World Health Organization*.  
432 1998;76(2):161.
- 433 36. Fonseca W, Kirkwood BR, Victora CG, Fuchs S, Flores J, Misago C. Risk factors for childhood  
434 pneumonia among the urban poor in Fortaleza, Brazil: a case-control study. *Bulletin of the World*  
435 *Health Organization*. 1996;74(2):199.
- 436 37. Koffi AK, Wounang RS, Nguéfack F, Moluh S, Libite PR, Kalter HD. Sociodemographic,  
437 behavioral, and environmental factors of child mortality in Eastern Region of Cameroon: results from  
438 a social autopsy study. *Journal of global health*. 2017;7(1).
- 439 38. Rosário EVN, Costa D, Timóteo L, Rodrigues AA, Varanda J, Nery SV, et al. Main causes of death  
440 in Dande, Angola: results from Verbal Autopsies of deaths occurring during 2009–2012. *BMC public*  
441 *health*. 2016;16(1):1-15.
- 442 39. Ceesay SJ, Casals-Pascual C, Erskine J, Anya SE, Duah NO, Fulford AJ, et al. Changes in malaria  
443 indices between 1999 and 2007 in The Gambia: a retrospective analysis. *The Lancet*.  
444 2008;372(9649):1545-54.
- 445 40. Ceesay SJ, Casals-Pascual C, Nwakanma DC, Walther M, Gomez-Escobar N, Fulford AJ, et al.  
446 Continued decline of malaria in The Gambia with implications for elimination. *PloS one*.  
447 2010;5(8):e12242.
- 448 41. International TGNMPaU. The Gambia Malaria Survey 2017. In: Statistics TGBo, editor. 2018.  
449 p. 47.
- 450



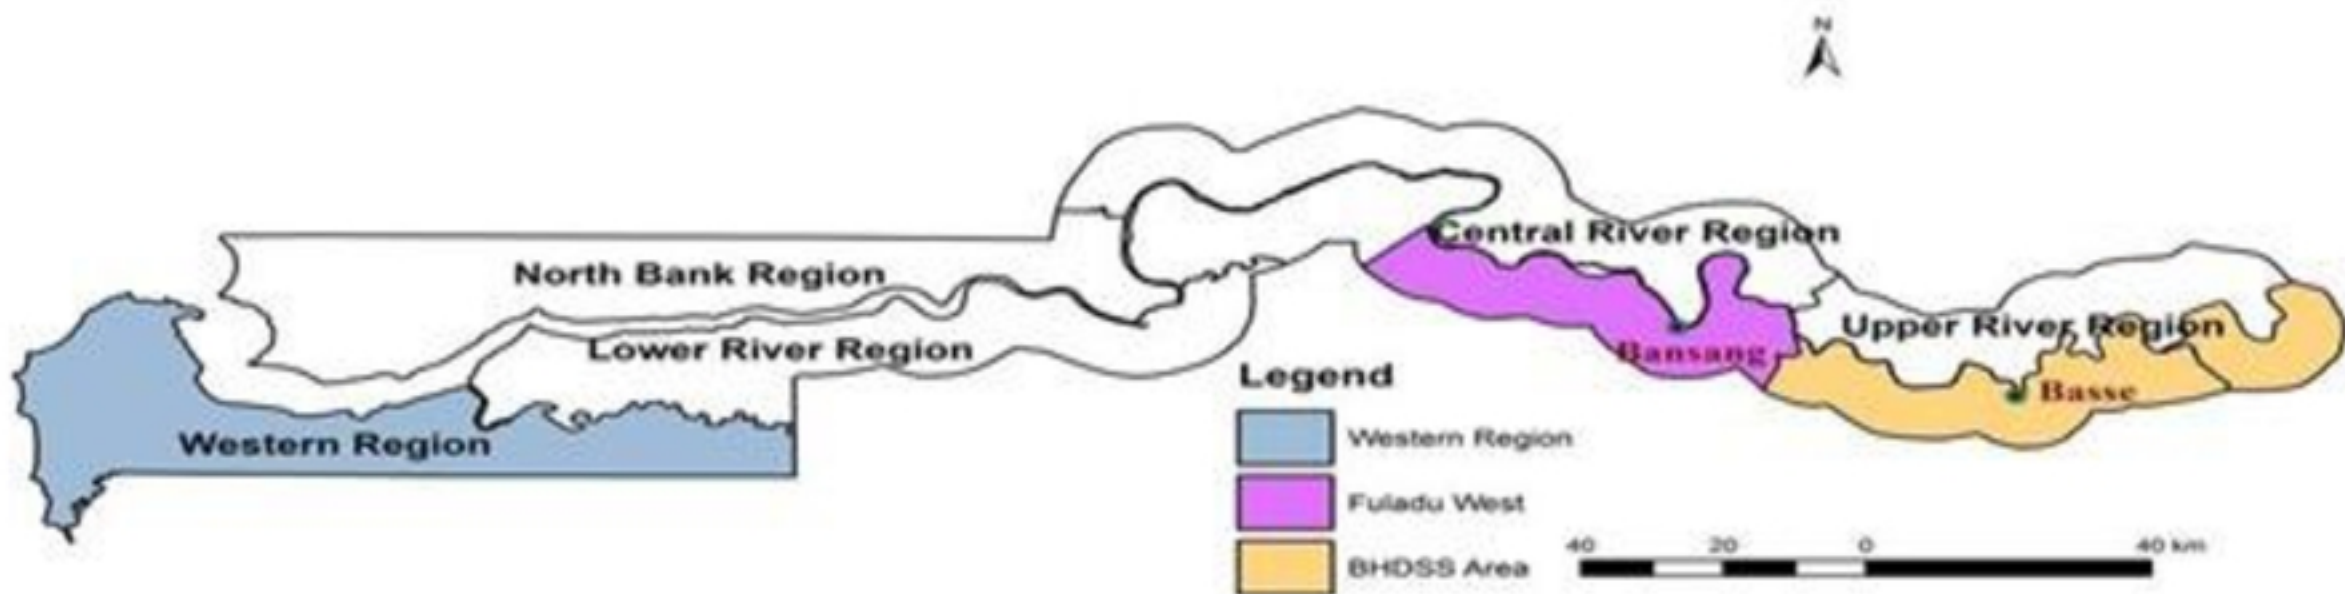

Figure

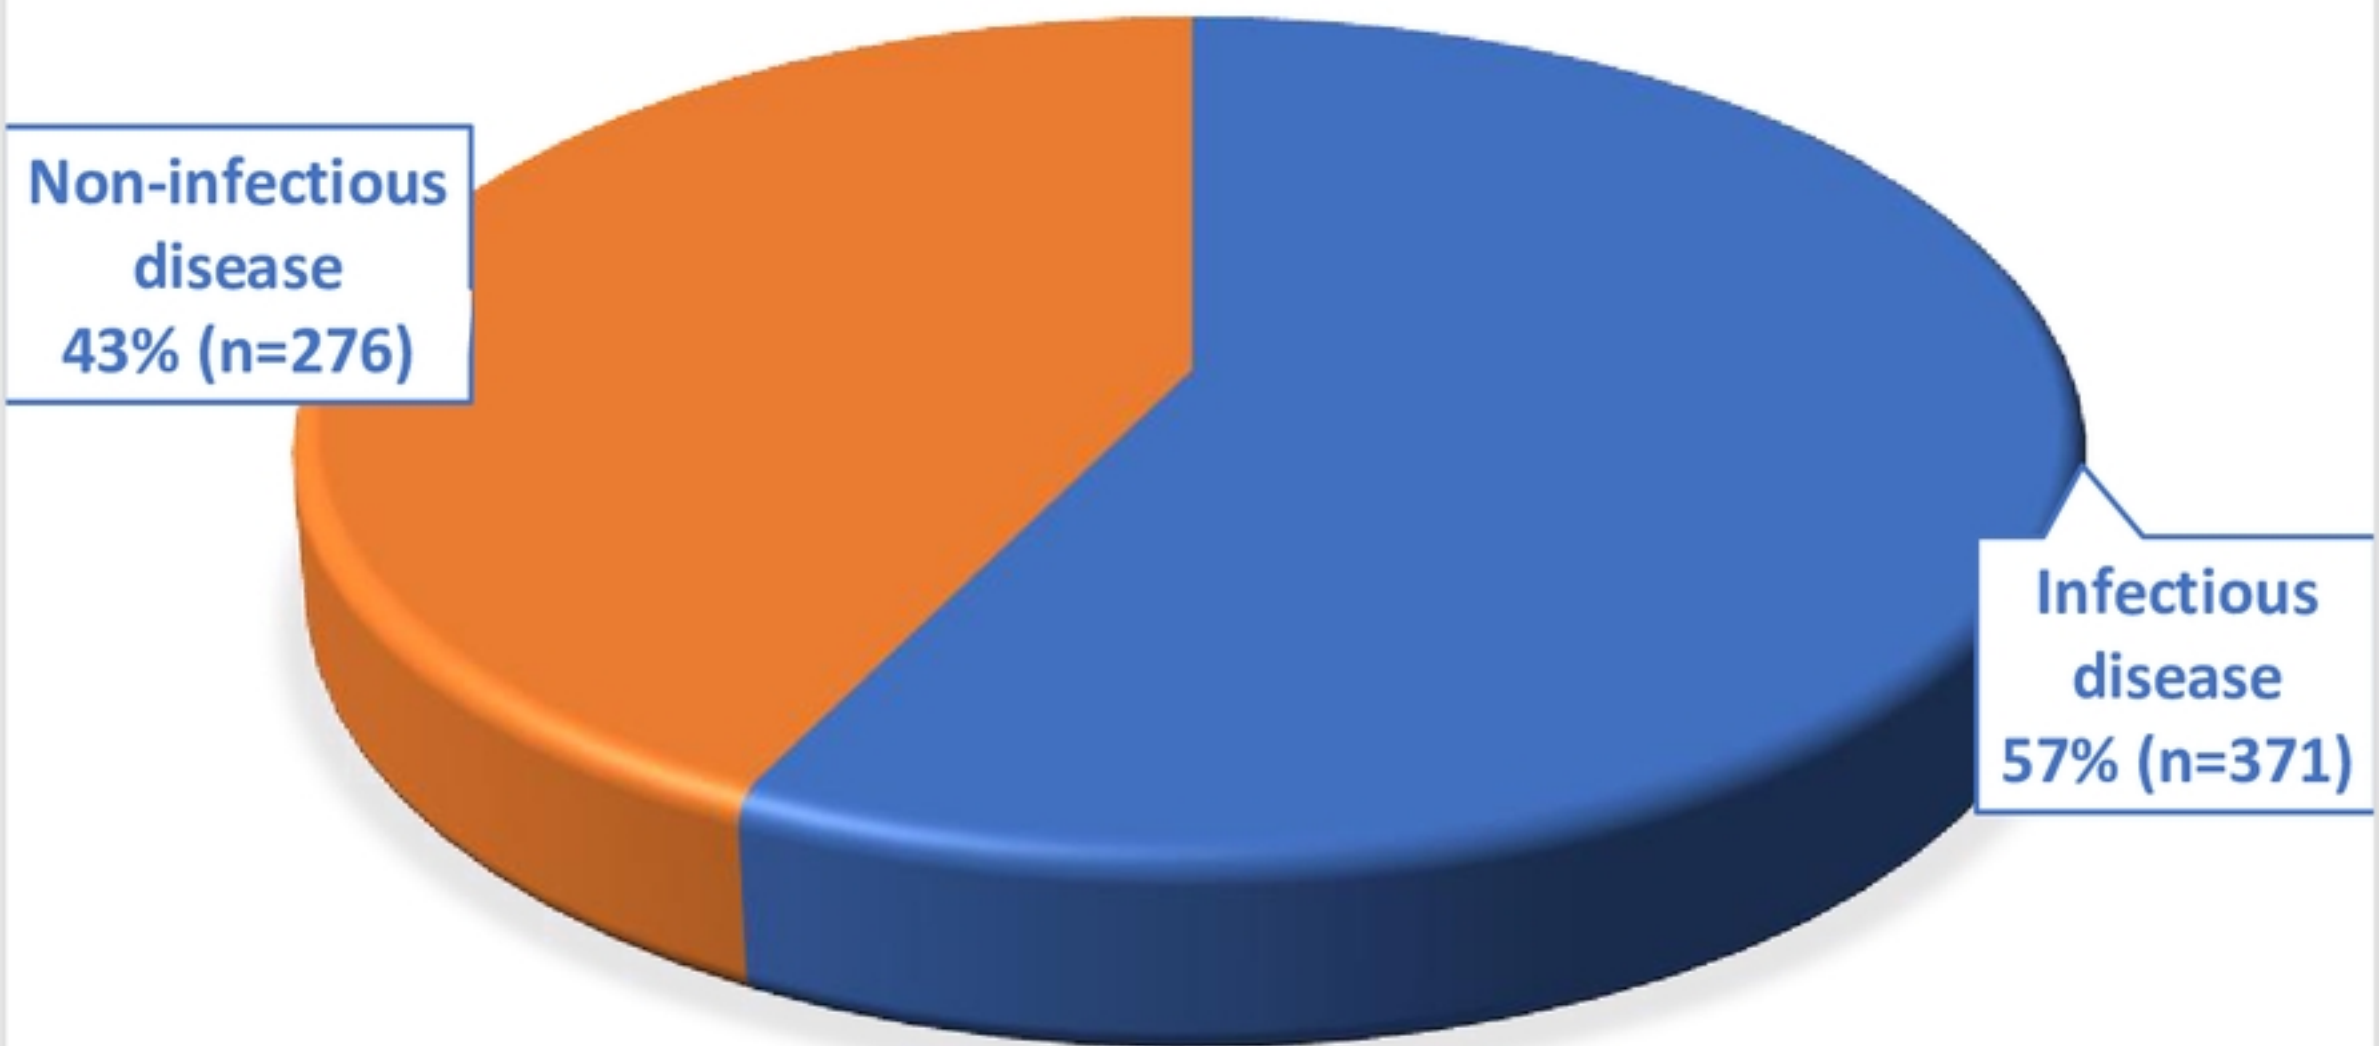

Figure
